# Supplementary material for: β-HPV Infection Correlates with Early Stages of Carcinogenesis in Skin Tumors and Patient-Derived Xenografts from a Kidney Transplant Recipient Cohort
Source: PubMed Central journal article supplement (PMC5807414; doi:10.3389/fmicb.2018.00117), 2018-02-05
Supplement: Image1.pdf [file Image1.pdf]

## *Supplementary Materials*

### **$\beta$ -HPV Infection Correlates with Early Stages of Carcinogenesis in Skin Tumors and Patient-Derived Xenografts from a Kidney Transplant Recipient Cohort**

Cinzia Borgogna<sup>1\*</sup>, Carlotta Olivero<sup>1,2\*</sup>, Simone Lanfredini<sup>2</sup>, Federica Calati<sup>1</sup>, Marco De Andrea<sup>1,3</sup>, Elisa Zavattaro<sup>4</sup>, Paola Savoia<sup>4</sup>, Elena Trisolini<sup>5</sup>, Renzo Boldorini<sup>5</sup>, Girish Patel<sup>2</sup>, and Marisa Gariglio<sup>1</sup>.

<sup>1</sup> Virology Unit, Department of Translational Medicine, Novara Medical School, Italy

<sup>2</sup> European Cancer Stem Cell Research Institute, School of Biosciences, Cardiff University, UK

<sup>3</sup> Virology Unit, Department of Public Health and Pediatric Sciences, Turin Medical School, Italy

<sup>4</sup> Dermatology Unit, Department of Health Sciences, Novara Medical School, Italy

<sup>5</sup> Pathology Unit, Department of Health Sciences, Novara Medical School, Italy

\*These authors contributed equally to this work.

**Corresponding Author:** marisa.gariglio@med.uniupo.it

**Figure 1S. Percentage of  $\Delta$ Np63+ or MCM7+ epithelial cells in skin lesions from the KTR cohort (n= 24, FFPE n=36). Positive cells were counted on three random fields (20X magnification) for each area: Non-pathological epithelium, HPV-infected area, Tumor. Error bars, SD. \*,  $p < 0.05$ .**

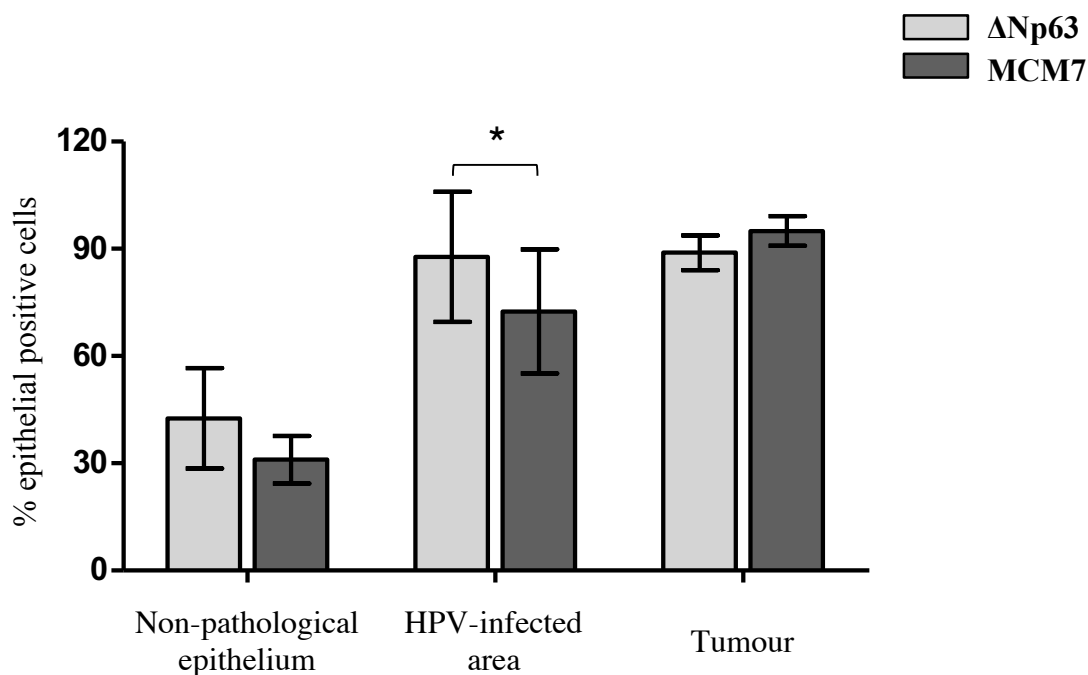

### Supplementary Materials and Methods

#### Statistical Analysis

For  $\Delta$ Np63+ and MCM7+ cell quantification, mean value  $\pm$  one standard deviation was presented. The statistical significance between two experimental groups is indicated in the figure by an asterisk. Comparisons were made using the Student's t test. Calculated  $p$ -values less than or equal to 0.05 were considered to be of statistical significance.
