# Supplementary material for: β-HPV Infection Correlates with Early Stages of Carcinogenesis in Skin Tumors and Patient-Derived Xenografts from a Kidney Transplant Recipient Cohort
Source: PubMed Central journal article supplement (PMC5807414; doi:10.3389/fmicb.2018.00117), 2018-02-05

## *Supplementary Materials*

### **$\beta$ -HPV Infection Correlates with Early Stages of Carcinogenesis in Skin Tumors and Patient-Derived Xenografts from a Kidney Transplant Recipient Cohort**

Cinzia Borgogna<sup>1\*</sup>, Carlotta Olivero<sup>1,2\*</sup>, Simone Lanfredini<sup>2</sup>, Federica Calati<sup>1</sup>, Marco De Andrea<sup>1,3</sup>, Elisa Zavattaro<sup>4</sup>, Paola Savoia<sup>4</sup>, Elena Trisolini<sup>5</sup>, Renzo Boldorini<sup>5</sup>, Girish Patel<sup>2</sup>, and Marisa Gariglio<sup>1</sup>.

<sup>1</sup> Virology Unit, Department of Translational Medicine, Novara Medical School, Italy

<sup>2</sup> European Cancer Stem Cell Research Institute, School of Biosciences, Cardiff University, UK

<sup>3</sup> Virology Unit, Department of Public Health and Pediatric Sciences, Turin Medical School, Italy

<sup>4</sup> Dermatology Unit, Department of Health Sciences, Novara Medical School, Italy

<sup>5</sup> Pathology Unit, Department of Health Sciences, Novara Medical School, Italy

\*These authors contributed equally to this work.

**Corresponding Author:** [marisa.gariglio@med.uniupo.it](mailto:marisa.gariglio@med.uniupo.it)

**Figure 2S. Tumor growth of the five successful xenografts obtained from three actinic keratoses (AKs) and two basal cell carcinomas (BCCs).** Xenograft growth was assessed weekly by measuring the longer diameter of the tumor mass (mm) by caliper from week 1 to 12 post-implantation. Pt=patient

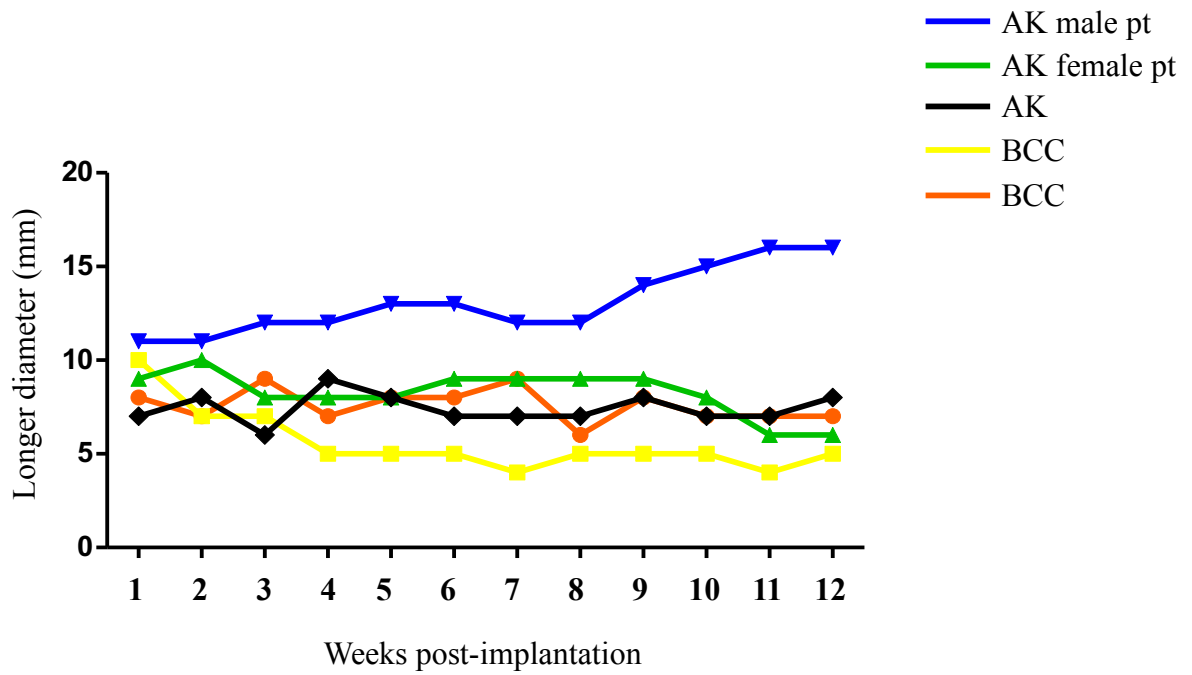

Supplement: Image2.pdf [file Image2.pdf]
